# Supplementary material for: An Integrative Model of Ion Regulation in Yeast
Source: PLOS journal article supplement (doi:10.1371/journal.pcbi.1002879), 2013-01-17
Supplement: S10 (10.1371/journal.pcbi.1002879.s010) [file journal.pcbi.1002879.s010]

**Table S2. Parameters for the transporter module**

| <b>Model /<br/>Parameter Name</b> | <b>Value</b> | <b>Unit</b>                    | <b>Reference</b>    |
|-----------------------------------|--------------|--------------------------------|---------------------|
| <i>Ena1p</i>                      |              |                                |                     |
| $k_{Ena1}^*$                      | 1.98*1e-4    | 1e-18 mol/(s*mM <sup>2</sup> ) | Estimated from [27] |
| $Km_{Ena1,Na}$                    | 200          | mM                             | Taken from [58]     |
| $Km_{Ena1,K}$                     | 300          | mM                             | Estimated from [58] |
| <i>Nha1p</i>                      |              |                                |                     |
| $k_{Nha1}^*$                      | 1.092*1e+5   | 1e-18 mol/(s*mM <sup>5</sup> ) | Estimated from [12] |
| $Km_{Nha1,Na}$                    | 12.7         | mM                             | Taken from [36]     |
| $Km_{Nha1\_high,K}$               | 12.4         | mM                             | Taken from [36]     |
| $Km_{Nha1\_low,K}$                | 1240         | mM                             |                     |
| $Km_{Nha1,Hog1}$                  | 1e-4         | mM                             |                     |
| <i>Tok1p</i>                      |              |                                |                     |
| $P_{s,Tok1}^*$                    | 4.6642       | 1e-18 m/s                      | Estimated from [59] |
| $\alpha_{Tok1}$                   | 231.6        |                                | Taken from [38]     |
| $\beta_{Tok1}$                    | 8122.7       |                                | Taken from [38]     |
| $l_{Tok1,ext}$                    | 0.0          |                                | Taken from [38]     |
| $l_{Tok1,int}$                    | 0.76875      |                                | Taken from [38]     |
| $k_{Tok1,1}$                      | 3.4*1e+7     | s <sup>-1</sup>                | Taken from [38]     |
| $k_{Tok1,2}$                      | 3.4*1e+7     | s <sup>-1</sup>                | Taken from [38]     |

|                                        |            |                               |                       |
|----------------------------------------|------------|-------------------------------|-----------------------|
| $k_{Tok1,OR}$                          | 1e+4       | $s^{-1}$                      | Taken from [38]       |
| $k_{Tok1,RO}$                          | 1e+4       | $s^{-1}$                      | Taken from [38]       |
| $Km_{Tok1,Hog1}$                       | 2*1e-5     | mM                            |                       |
| <b><i>Trk system</i></b>               |            |                               |                       |
| $k_{Trk}^*$                            | 54.0       | 1e-18 mol/(s*V <sup>2</sup> ) | Estimated from [6,55] |
| $Km_{Trk\_high,K}$                     | 0.01       | mM                            | Taken from [39]       |
| $Km_{Trk\_high,Na}$                    | 100.0      | mM                            |                       |
| $Km_{Trk\_medium,K}$                   | 0.4        | mM                            | Taken from [39]       |
| $Km_{Trk\_medium,Na}$                  | 40.0       | mM                            |                       |
| $Km_{Trk,Ppz}$                         | 1e-5       | mM                            | Estimated from [9,55] |
| $Km_{Trk,Cn}$                          | 5*1e-4     | mM                            | Estimated from [9,55] |
| <b><i>Ppz phosphatases</i></b>         |            |                               |                       |
| $Ppz^0$                                | 6.607*1e-5 | mM                            | [60]                  |
| $Km_{Ppz}$                             | 7.94*1e-5  | mM                            |                       |
| <b><i>NSC1</i></b>                     |            |                               |                       |
| $k_{NHS1}^*$                           | 6*1e-4     | 1e-18 mol/(s*mM)              |                       |
| $Km_{NSC1,K}$                          | 60.0       | mM                            | Taken from [61]       |
| $Km_{NSC1,Na}$                         | 100.0      | mM                            |                       |
| <b><i>H<sup>+</sup> production</i></b> |            |                               |                       |
| $K_{H\_prod}$                          | 5          | 1e-18 mol/s                   |                       |
| <b><i>H<sup>+</sup> uptake</i></b>     |            |                               |                       |
| $k_{H\_uptake}$                        | 10.0       | 1e-18 mol/(s*V)               |                       |

|              |                   |                                                              |                     |
|--------------|-------------------|--------------------------------------------------------------|---------------------|
| <i>Pma1p</i> |                   |                                                              |                     |
| $k_{Pma1}^*$ | $4.8 \times 10^4$ | $1 \times 10^{-18} \text{ mol}/(\text{s} \cdot \text{mM}^2)$ | Estimated from [45] |

\* The values of these parameters were adjusted during the model integration step such that simulation results are consistent with experimental data.
