# Supplementary material for: An Integrative Model of Ion Regulation in Yeast
Source: PLOS journal article supplement (doi:10.1371/journal.pcbi.1002879), 2013-01-17
Supplement: S11 (10.1371/journal.pcbi.1002879.s011) [file journal.pcbi.1002879.s011]

**Table S3. Parameters for the transcriptional module**

| Model/ Parameters        | Value       | Unit                           | Reference       |
|--------------------------|-------------|--------------------------------|-----------------|
| <b><i>Hog1 Model</i></b> |             |                                |                 |
| $\alpha_{Hog1}$          | 0.398 *1e+6 | $J \cdot m^{-3}$               | Taken from [50] |
| $\beta_{Hog1}$           | 0.2992      |                                | Taken from [50] |
| $\gamma_{Hog1}$          | 0.9626*1e+6 | $J \cdot m^{-3}$               | Taken from [50] |
| $w_{Hog1}$               | 4.688*1e+3  | $J \cdot m^{-3} \cdot mM^{-1}$ | Taken from [50] |
| $K_{pho}^{Pbs2}$         | 0.6537      | $s^{-1}$                       | Taken from [50] |
| $K_{depho}^{Pbs2}$       | 0.224       | $s^{-1}$                       | Taken from [50] |
| $K_{pho}^{Hog1}$         | 186.67      | $mM^{-1} \cdot s^{-1}$         | Taken from [50] |
| $K_{depho}^{Hog1PPc}$    | 1.5*1e-3    | $s^{-1}$                       | Taken from [50] |
| $K_{imp}^{Hog1c}$        | 0.0125      | $s^{-1}$                       | Taken from [50] |
| $K_{exp}^{Hog1n}$        | 0.106       | $s^{-1}$                       | Taken from [50] |
| $K_{imp}^{Hog1PPc}$      | 0.02        | $s^{-1}$                       | Taken from [50] |
| $K_{exp}^{Hog1PPn}$      | 0.1179      | $s^{-1}$                       | Taken from [50] |
| $K_{depho}^{Hog1PPn}$    | 0.0686      | $s^{-1}$                       | Taken from [50] |
| $K_{s0}^{Glyc}$          | 0.0875      | $mM \cdot s^{-1}$              | Taken from [50] |
| $K_{s1}^{Glyc}$          | 0.9357      | $mM \cdot s^{-1}$              | Taken from [50] |
| $K_{s2}^{Glyc}$          | 18.983      | $s^{-1}$                       | Taken from [50] |
| $K_{exp0}^{Glyc}$        | 8.333*1e-5  | $s^{-1}$                       | Taken from [50] |
| $K_{exp1}^{Glyc}$        | 4.938*1e-4  | $s^{-1}$                       | Taken from [50] |

|                                 |            |                                   |                        |
|---------------------------------|------------|-----------------------------------|------------------------|
| $K_{s0}^{Yr}$                   | 2.018*1e-7 | $\mu\text{M}\cdot\text{min}^{-1}$ | Taken from [50]        |
| $K_{s1}^{Yr}$                   | 0.02       | $\text{s}^{-1}$                   | Taken from [50]        |
| $K_t^{Yr}$                      | 1.489*1e-4 | $\text{s}^{-1}$                   | Taken from [50]        |
| <b><i>Calcineurin Model</i></b> |            |                                   |                        |
| $C_{Ca}$                        | 2.5*1e-6   | $\text{mM s}^{-1}$                |                        |
| $d_{Ca}$                        | 0.05       | $\text{s}^{-1}$                   | Estimated from [25]    |
| $h_{Na\_cyt}^*$                 | 12         |                                   | Estimated from [25,27] |
| $h_{Na\_ext}^*$                 | 2          |                                   | Estimated from [25,27] |
| $k_{Ca,cyt}^*$                  | 8.0*1e-6   | $\text{mM s}^{-1}$                | Estimated from [25,27] |
| $k_{Ca,ext}^*$                  | 2.4*1e-5   | $\text{mM s}^{-1}$                | Estimated from [25,27] |
| $Km_{Ca\_cyt}$                  | 180.0      | $\text{mM}$                       | Estimated from [25,27] |
| $Km_{Ca\_ext}$                  | 500.0      | $\text{mM}$                       | Estimated from [25,27] |
| $k_{Ca,pH}^*$                   | 1.5*1e-5   | $\text{mM s}^{-1}$                |                        |
| $k_{CN,a}$                      | 1.0e+9     | $\text{mM}^{-3} \text{s}^{-1}$    | Estimated from [62]    |
| $k_{CN,da}$                     | 5.0*1e-4   | $\text{s}^{-1}$                   | Estimated from [62]    |
| $k_{CN\_Ppz,da}^*$              | 200.0      | $\text{mM}^{-1} \text{s}^{-1}$    | Estimated from [63]    |
| $C_{Crz1}$                      | 7.866*1e-7 | $\text{mM s}^{-1}$                |                        |
| $d_{Crz1}$                      | 4.1*1e-3   | $\text{s}^{-1}$                   |                        |
| $k_{Crz1}^*$                    | 0.1        | $\text{s}^{-1}$                   |                        |
| <b><i>Nrg1p Model</i></b>       |            |                                   |                        |
| $C_{Nrg1}$                      | 4*1e-7     | $\text{mM s}^{-1}$                |                        |
| $d_{Nrg1}$                      | 7.5*1e-4   | $\text{s}^{-1}$                   | Estimated from [64]    |

|                          |                         |                    |                           |
|--------------------------|-------------------------|--------------------|---------------------------|
| $k_{Nrg1,pH}^*$          | $5.25 \cdot 10^{-8}$    | $\text{mM s}^{-1}$ | Estimated from [34,65]    |
| <b><i>ENAI Model</i></b> |                         |                    |                           |
| $C_{ENAI,Nrg1}^*$        | $1.5 \cdot 10^{-6}$     | $\text{mM s}^{-1}$ | Estimated from [33,60,66] |
| $Km_{ENAI,Nrg1}^*$       | $1.143.0 \cdot 10^{-4}$ | $\text{mM}$        | Estimated from [34,65]    |
| $h_{ENAI,Nrg1}^*$        | 3                       |                    |                           |
| $k_{ENAI,Crz1}^*$        | $4.5 \cdot 10^{-5}$     | $\text{s}^{-1}$    | Estimated from [27,33]    |
| $k_{ENAI,Hog1}^*$        | $1.5 \cdot 10^{-6}$     | $\text{s}^{-1}$    | Estimated from [27,33]    |
| $d_{ENAI,mRNA}^*$        | 0.00683                 | $\text{s}^{-1}$    | Estimated from [66]       |
| $kt_{Ena1}$              | 0.0205                  | $\text{s}^{-1}$    |                           |
| $d_{Ena1}$               | $1.33 \cdot 10^{-3}$    | $\text{s}^{-1}$    | Estimated from [64]       |

\* The values of these parameters were adjusted during the model integration step such that simulation results are consistent with experimental data.
